# Supplementary material for: Efficacy and safety of guselkumab and adalimumab for pustulotic arthro-osteitis and their impact on peripheral blood immunophenotypes
Source: Springer Nature journal article supplement (doi:10.1186/s13075-022-02934-3), 2022-10-27
Supplement: MOESM1 [file 23646832]

# Supplementary Figure S1

## (A) CD4<sup>+</sup> T cells

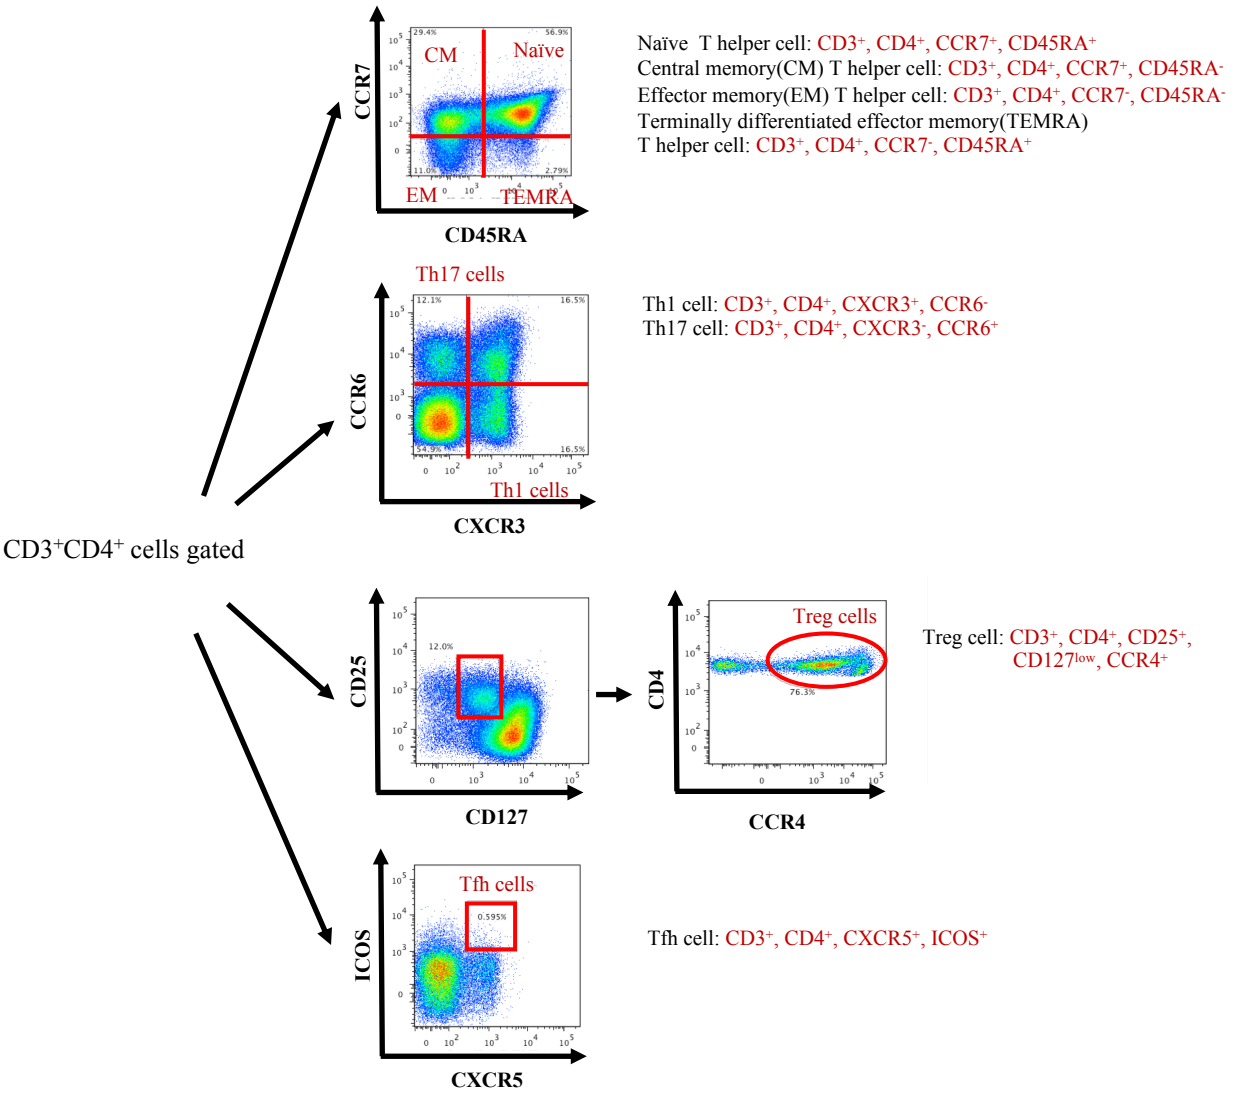

## (B) CD8<sup>+</sup> T cells

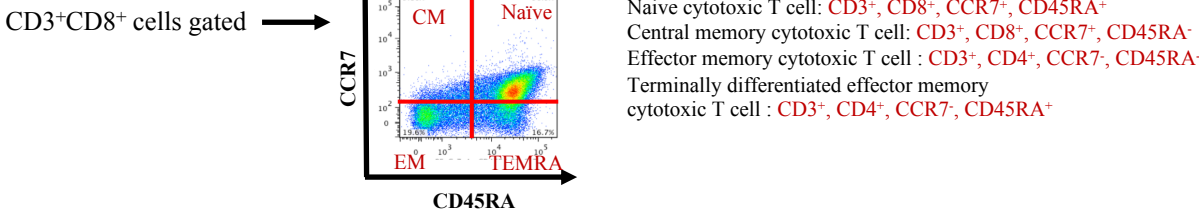

# Supplementary Figure S1

## (C) Activated T cells

a)

CD3<sup>+</sup>CD4<sup>+</sup> cells gated

Activated CD4<sup>+</sup> T cell:  
CD3<sup>+</sup>, CD4<sup>+</sup>, CD38<sup>+</sup>, HLA-DR<sup>+</sup>

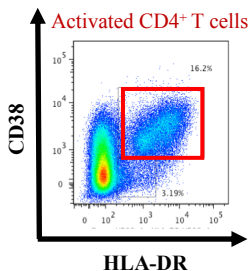

b)

CD3<sup>+</sup> CD4<sup>+</sup>  
CXCR3<sup>+</sup> CCR6<sup>-</sup> gated

Activated Th1 cell:  
CD3<sup>+</sup>, CD4<sup>+</sup>, CXCR3<sup>+</sup> CCR6<sup>-</sup>,  
CD38<sup>+</sup>, HLA-DR<sup>+</sup>

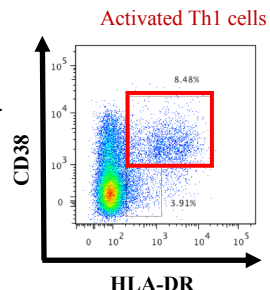

c)

CD3<sup>+</sup> CD4<sup>+</sup>  
CXCR3<sup>+</sup> CCR6<sup>+</sup> gated

Activated Th17 cell:  
CD3<sup>+</sup>, CD4<sup>+</sup>, CXCR3<sup>+</sup> CCR6<sup>+</sup>,  
CD38<sup>+</sup>, HLA-DR<sup>+</sup>

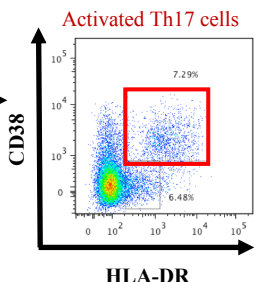

d)

CD3<sup>+</sup> CD4<sup>+</sup>  
CD25<sup>+</sup> CD127<sup>low</sup> CCR4<sup>+</sup> gated

Activated Treg cell:  
CD3<sup>+</sup>, CD4<sup>+</sup>, CD25<sup>+</sup>, CD127<sup>low</sup>,  
CCR4<sup>+</sup> CD38<sup>+</sup>, HLA-DR<sup>+</sup>

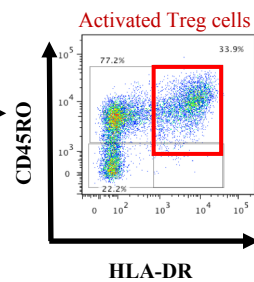

e)

CD3<sup>+</sup> CD4<sup>+</sup>  
CXCR5<sup>+</sup> ICOS<sup>+</sup> gated

Activated Tfh cell:  
CD3<sup>+</sup>, CD4<sup>+</sup>, CXCR5<sup>+</sup>, ICOS<sup>+</sup>, CD69<sup>+</sup>

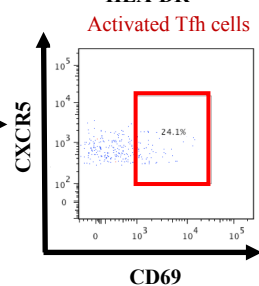

f)

CD3<sup>+</sup>CD8<sup>+</sup> cells gated

Activated CD8<sup>+</sup> T cell:  
CD3<sup>+</sup>, CD8<sup>+</sup>, CD38<sup>+</sup>, HLA-DR<sup>+</sup>

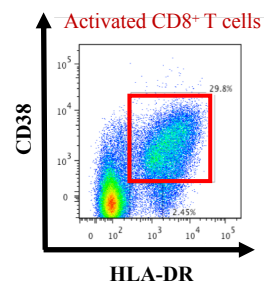

## (D) B cells

CD3<sup>+</sup>CD19<sup>+</sup> cells gated

Naïve B cell:  
CD3<sup>-</sup>, CD19<sup>+</sup>, CD27<sup>-</sup>, IgD<sup>-</sup>  
Double negative B cell:  
CD3<sup>-</sup>, CD19<sup>+</sup>, CD27<sup>-</sup>, IgD<sup>-</sup>  
IgM memory B cell:  
CD3<sup>-</sup>, CD19<sup>+</sup>, CD27<sup>+</sup>, IgD<sup>-</sup>  
Class-switched memory B cell:  
CD3<sup>-</sup>, CD19<sup>+</sup>, CD27<sup>+</sup>, IgD<sup>+</sup>

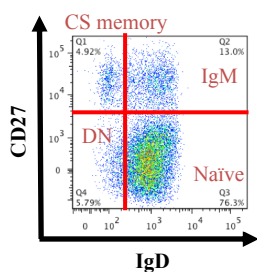

CD3<sup>+</sup>CD19<sup>+</sup>  
CD27<sup>+</sup> cells gated

Plasmacyte:  
CD3<sup>-</sup>, CD19<sup>+</sup>, CD27<sup>+</sup>, CD20<sup>+</sup>, CD38<sup>+</sup>

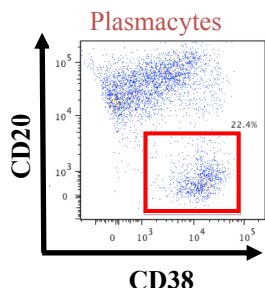

## (E) Monocytes

CD3<sup>-</sup> CD19<sup>-</sup> CD20<sup>-</sup> CD14<sup>+</sup> cells

Classical monocytes

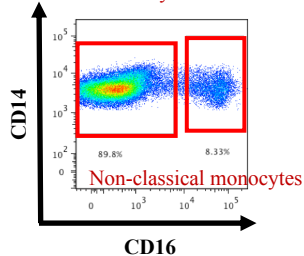

Classical monocyte:  
CD3<sup>-</sup>, CD19<sup>-</sup>, CD20<sup>-</sup>, CD14<sup>+</sup>, CD16<sup>+</sup>  
Non-classical monocyte:  
CD3<sup>-</sup>, CD19<sup>-</sup>, CD20<sup>-</sup>, CD14<sup>+</sup>, CD16<sup>-</sup>

## (F) DCs, NK cells

CD3<sup>-</sup> CD19<sup>-</sup> CD20<sup>-</sup> CD14<sup>-</sup> cells

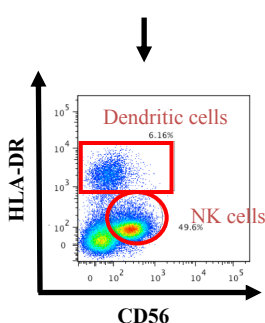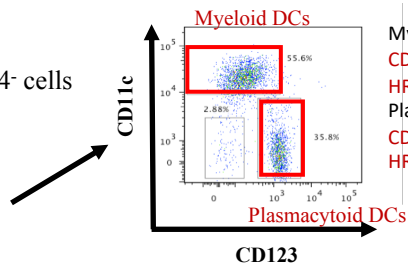

Myeloid DC:  
CD3<sup>-</sup>, CD19<sup>-</sup>, CD20<sup>-</sup>, CD14<sup>-</sup>,  
HRA-DR<sup>+</sup>, CD11c<sup>+</sup>  
Plasmacytoid DCs:  
CD3<sup>-</sup>, CD19<sup>-</sup>, CD20<sup>-</sup>, CD14<sup>-</sup>,  
HRA-DR<sup>+</sup>, CD123<sup>+</sup>

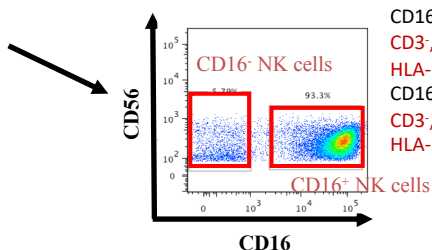

CD16<sup>-</sup> NK cell:  
CD3<sup>-</sup>, CD19<sup>-</sup>, CD20<sup>-</sup>, CD14<sup>-</sup>,  
HLA-DR<sup>-</sup>, CD56<sup>+</sup>, CD16<sup>-</sup>  
CD16<sup>+</sup> NK cell:  
CD3<sup>-</sup>, CD19<sup>-</sup>, CD20<sup>-</sup>, CD14<sup>-</sup>,  
HLA-DR<sup>-</sup>, CD56<sup>+</sup>, CD16<sup>+</sup>
