# Supplementary material for: Efficacy and safety of guselkumab and adalimumab for pustulotic arthro-osteitis and their impact on peripheral blood immunophenotypes
Source: Springer Nature journal article supplement (doi:10.1186/s13075-022-02934-3), 2022-10-27

# Supplementary Figure S2

## A. DAPSA-LDA Responders

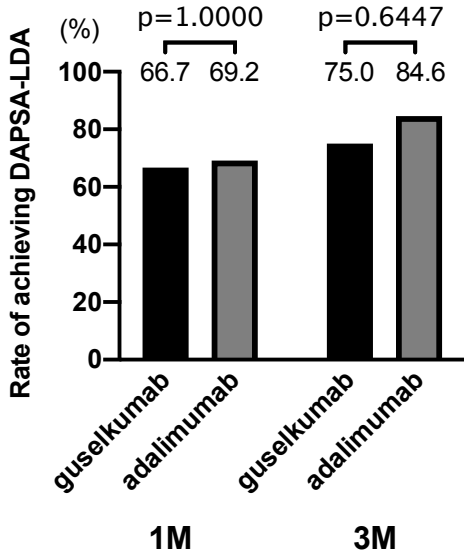

## B. DAPSA-REM Responders

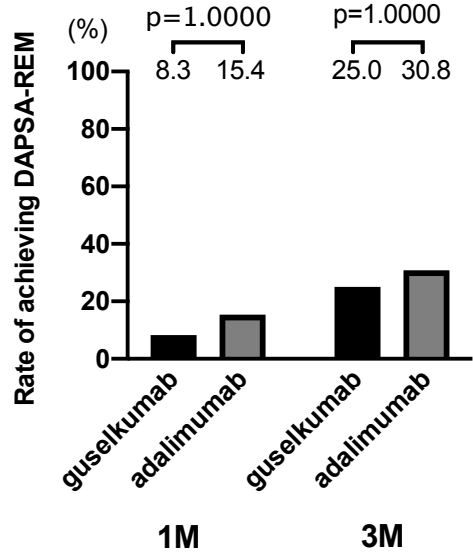

## C. PPPASI-50 Responders

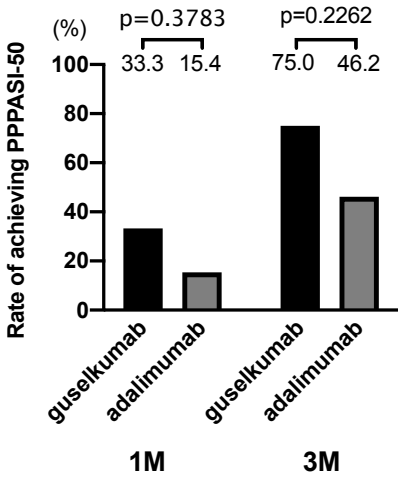

## D. PPPASI-75 Responders

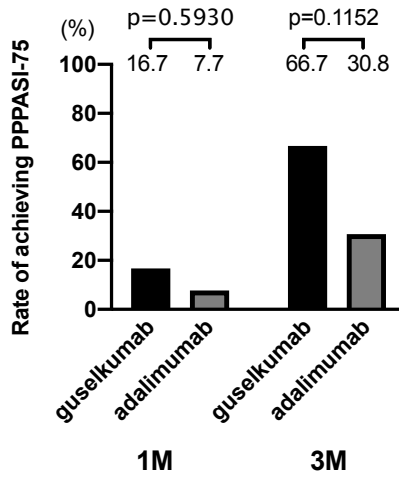

## E. PPPASI-90 Responders

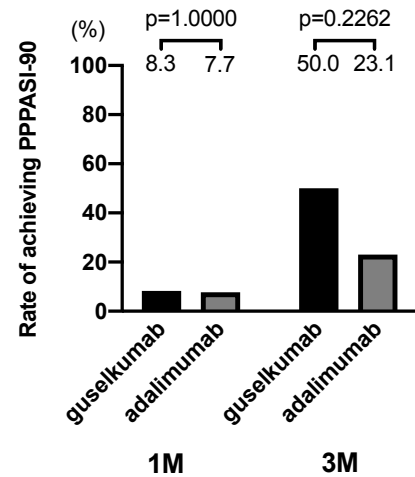

Supplement: MOESM2 [file 23646832]
