# Supplementary material for: Efficacy and safety of guselkumab and adalimumab for pustulotic arthro-osteitis and their impact on peripheral blood immunophenotypes
Source: Springer Nature journal article supplement (doi:10.1186/s13075-022-02934-3), 2022-10-27

# Supplementary Figure S 4

## A. CD4<sup>+</sup> T cells

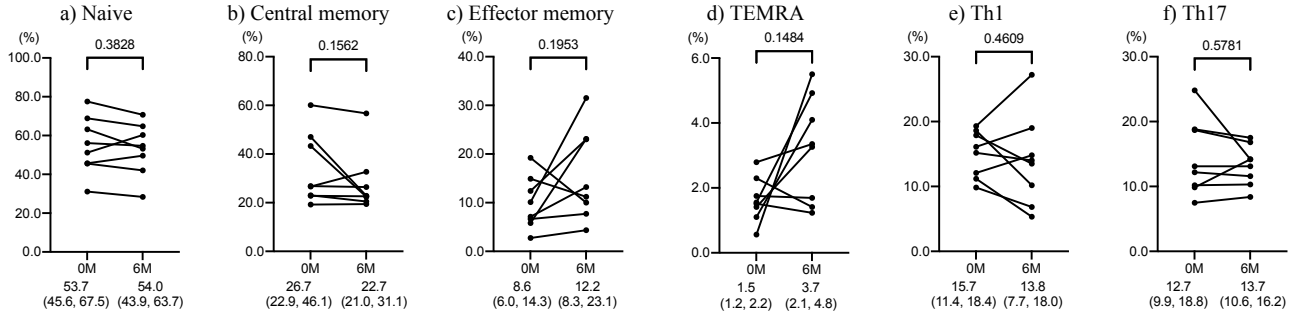

## B. CD8<sup>+</sup> T cells

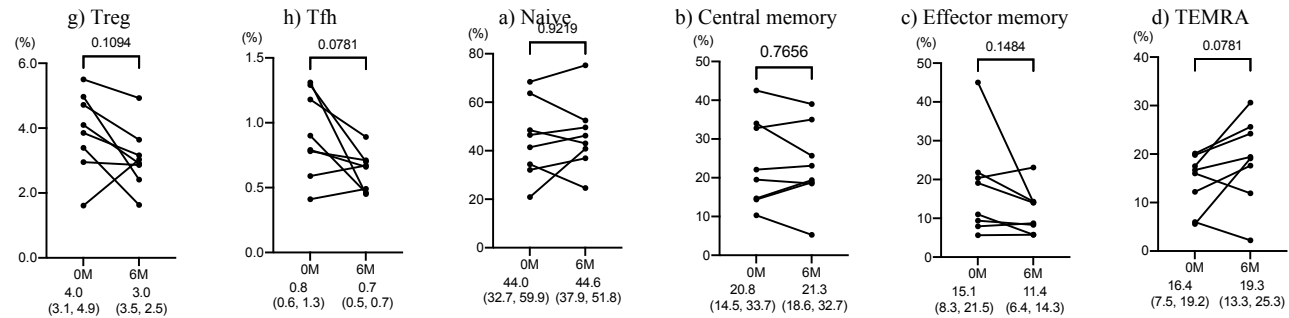

## C. Activated T cells

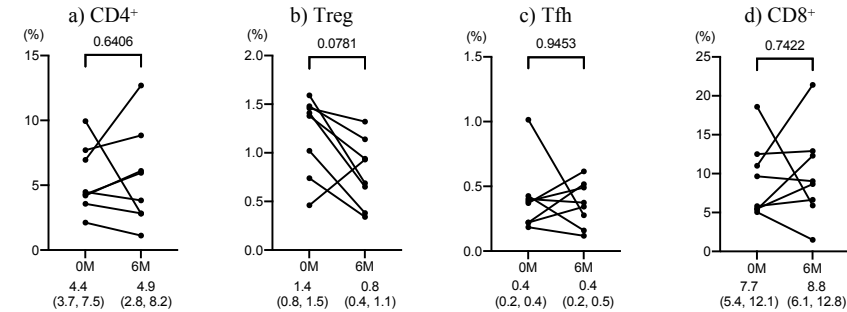

## D. B cells

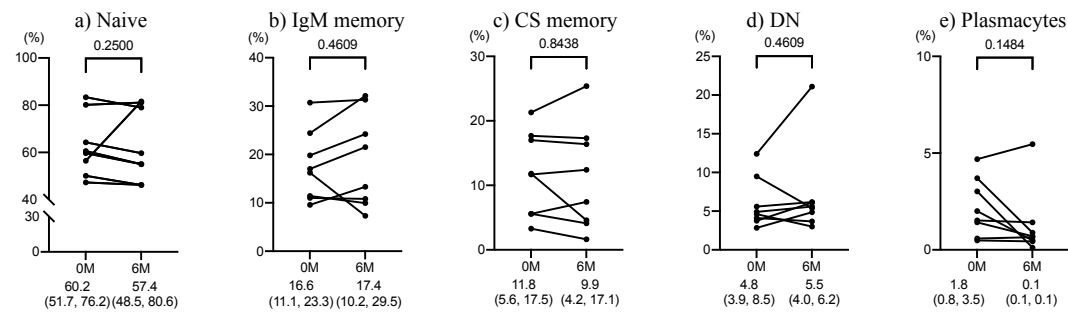

## E. Monocytes

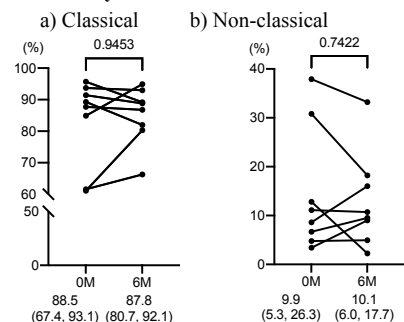

## F. DCs

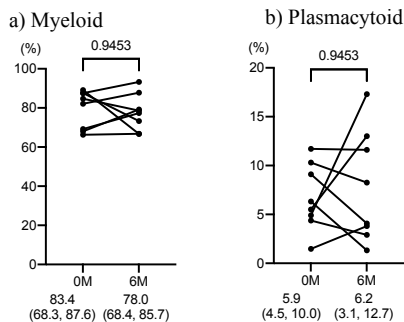

## G. NK cells

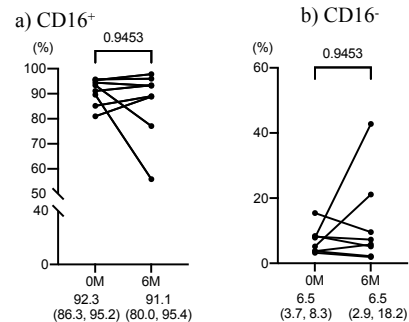

Supplement: MOESM4 [file 23646832]
