# Supplementary material for: Efficacy and safety of guselkumab and adalimumab for pustulotic arthro-osteitis and their impact on peripheral blood immunophenotypes
Source: Springer Nature journal article supplement (doi:10.1186/s13075-022-02934-3), 2022-10-27

# Supplementary Figure S5

## a). TNF- $\alpha$

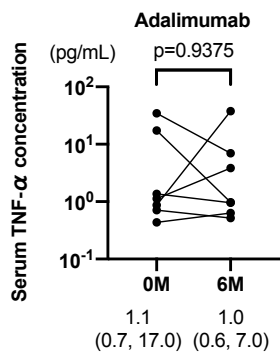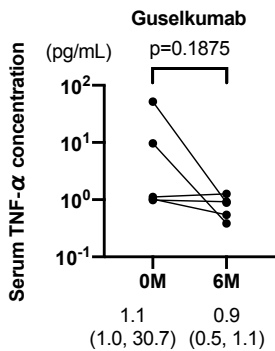

## b). IL-17A

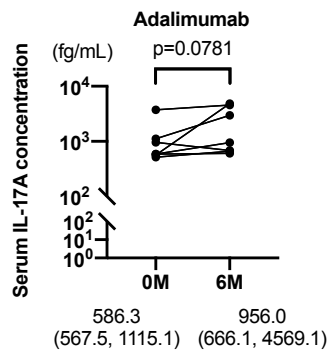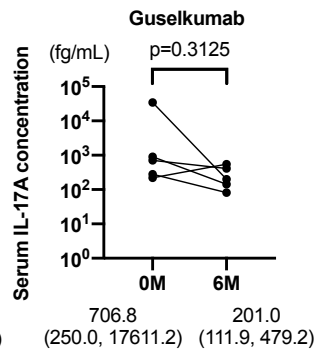

Supplement: MOESM5 [file 23646832]
